# Supplementary material for: HIF stabilization inhibits renal epithelial cell migration and is associated with cytoskeletal alterations
Source: PubMed Central journal article supplement (PMC6015081; doi:10.1038/s41598-018-27918-9), 2018-06-22

# Supplementary data

## **HIF stabilization inhibits renal epithelial cell migration and is associated with cytoskeletal alterations**

Simon Müller<sup>1\*</sup>, Sonja Djudjaj<sup>3\*</sup>, Janina Lange<sup>2</sup>, Mihail Iacovescu<sup>1</sup>, Margarete Goppelt-Struebe<sup>1</sup>, Peter Boor<sup>§3,4</sup>

## Supplementary Figures

### **Supplementary Fig. S1: Faster Migration of E-cadherin-positive distal tubules**

hPTEC were seeded in Ibidi barriers in 8-well slides and grown to confluence. After removal of the barriers, cells were allowed to migrate into the open space for 7 h. Cells were stained for E-cadherin (red) and N-cadherin (green). Arrows point to faster migrating cells. Arrowheads marked E- and N-cadherin positive cells. Scale bar: 40  $\mu\text{m}$

### **Supplementary Fig. S2: DMOG-induced morphological alterations.**

Sub-confluent hPTEC were incubated with DMOG (1 mM) for 24 h. Paxillin and F-actin were detected by immunofluorescence. Scale bar: 10  $\mu\text{m}$

### **Supplementary Fig. S3: Variable expression of K18 in renal epithelial cells**

A: Monolayers of hPTEC were stained with antibodies against N-cadherin and K18. Scale bar: 30  $\mu\text{m}$

B: K18 was detected in a monolayer of distal tubular cells. Scale bar: 30  $\mu\text{m}$

C: K18 was detected in human kidney sections by immunohistochemistry. Scale bar: 30 $\mu\text{m}$

### **Supplementary Fig. S4: DMOG does not alter expression of K7 or K19 in hPTEC**

hPTEC were incubated with DMOG (1 mM) for 24 h and 72 h. Expression of K7 and K19 was detected by Western blotting using specific antibodies. Blots obtained from cells incubated for 24 h were re probed with Vinculin (Vinc). The graphs summarize data obtained by densitometric quantification of n=3 experiments with different isolations (means  $\pm$  SD). Data obtained with control cells were set to 100.

## **Supplementary Fig. S5: Original blots**

All blots used for the manuscript figures are shown without any modifications.

## Supplementary Figures

### **Supplementary Fig. S1: Faster Migration of E-cadherin-positive distal tubules**

hPTEC were seeded in Ibidi barriers in 8-well slides and grown to confluence. After removal of the barriers, cells were allowed to migrate into the open space for 7 h. Cells were stained for E-cadherin (red) and N-cadherin (green). Arrows point to faster migrating cells. Arrowheads marked E- and N-cadherin positive cells. Scale bar: 40  $\mu\text{m}$

### **Supplementary Fig. S2: DMOG-induced morphological alterations.**

Sub-confluent hPTEC were incubated with DMOG (1 mM) for 24 h. Paxillin and F-actin were detected by immunofluorescence. Scale bar: 10  $\mu\text{m}$

### **Supplementary Fig. S3: Variable expression of K18 in renal epithelial cells**

A: Monolayers of hPTEC were stained with antibodies against N-cadherin and K18. Scale bar: 30  $\mu\text{m}$

B: K18 was detected in a monolayer of distal tubular cells. Scale bar: 30  $\mu\text{m}$

C: K18 was detected in human kidney sections by immunohistochemistry. Scale bar: 30 $\mu\text{m}$

### **Supplementary Fig. S4: DMOG does not alter expression of K7 or K19 in hPTEC**

hPTEC were incubated with DMOG (1 mM) for 24 h and 72 h. Expression of K7 and K19 was detected by Western blotting using specific antibodies. Blots obtained from cells incubated for 24 h were reprobated with Vinculin (Vinc). The graphs summarize data obtained by densitometric quantification of n=3 experiments with different isolations (means  $\pm$  SD). Data obtained with control cells were set to 100.

## **Supplementary Fig. S5: Original blots**

All blots used for the manuscript figures are shown without any modifications.

# Supplementary Figure 1

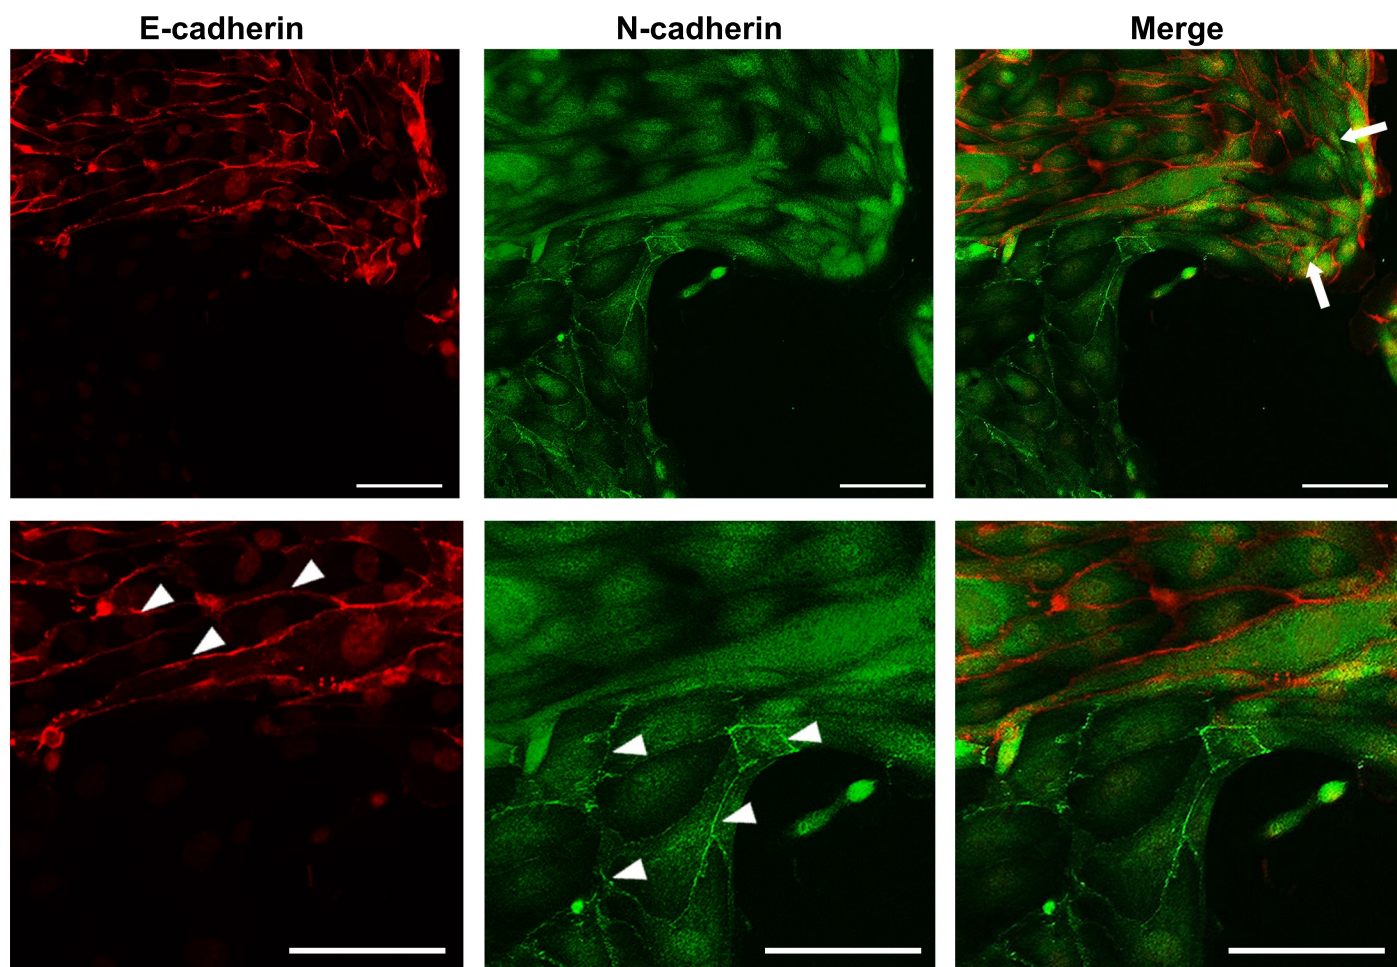

# Supplementary Figure 2

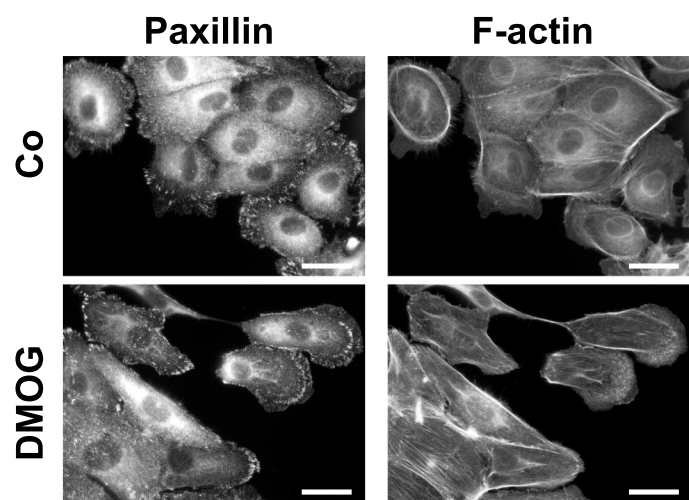

# Supplementary Figure 3

**A**

**Keratin 18**

**N-cadherin**

**Merged**

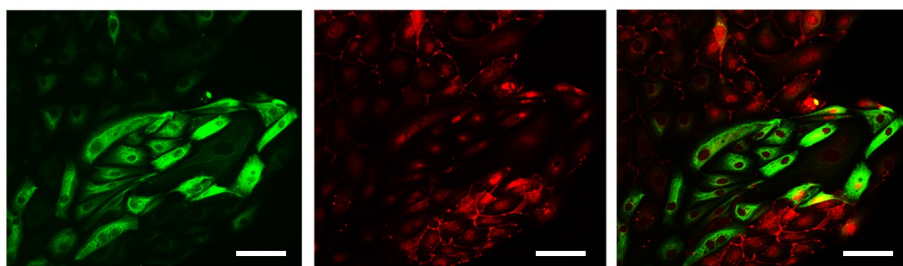

**B**

**Keratin 18**

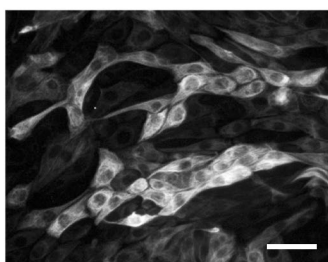

**C**

**Keratin 18**

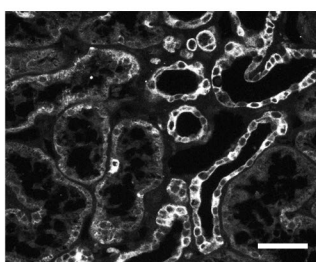



# Supplementary Figure 4

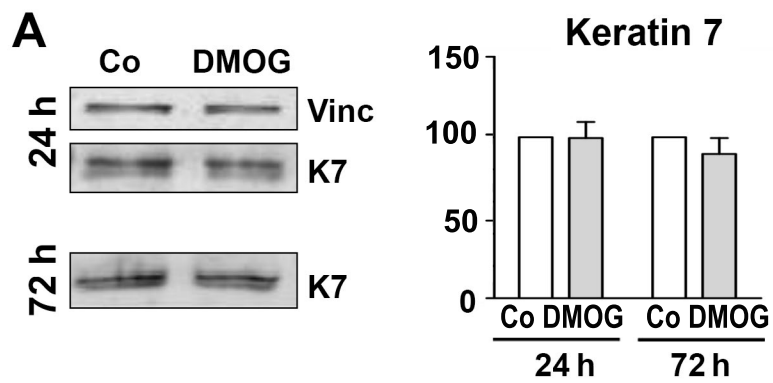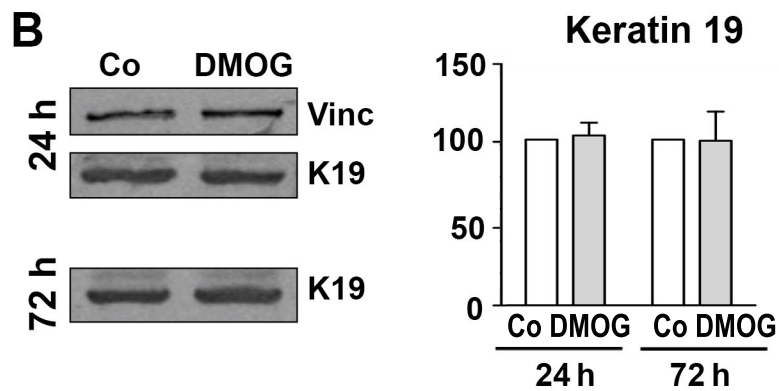

# Supplementary Figure 5

Blots from Figure 4 B

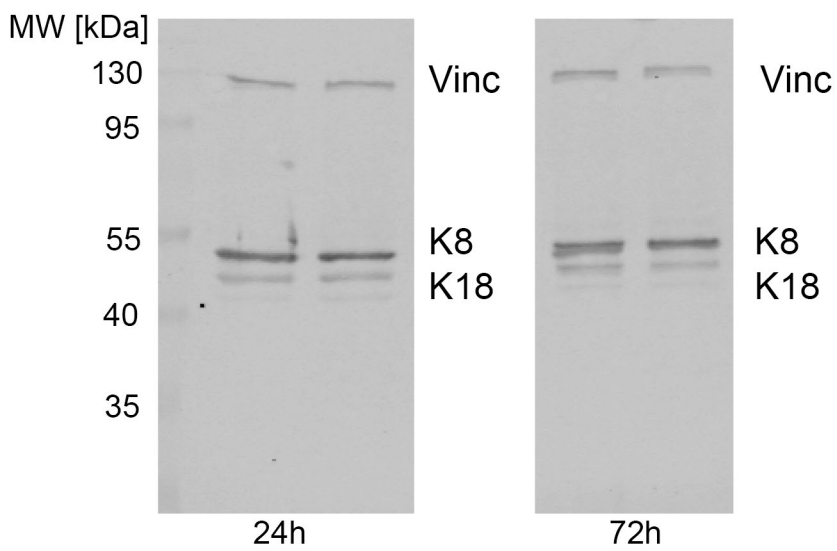

Blot from Figure 4 C

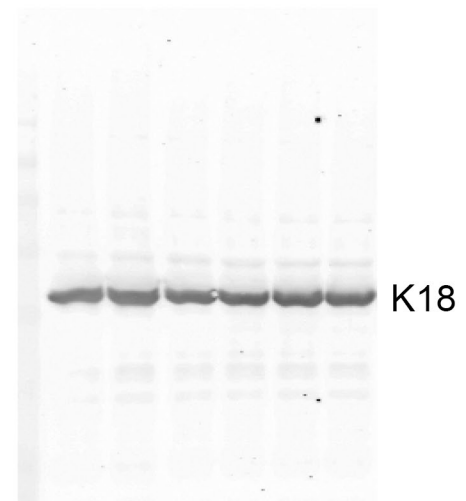

Blots from Figure 5 B

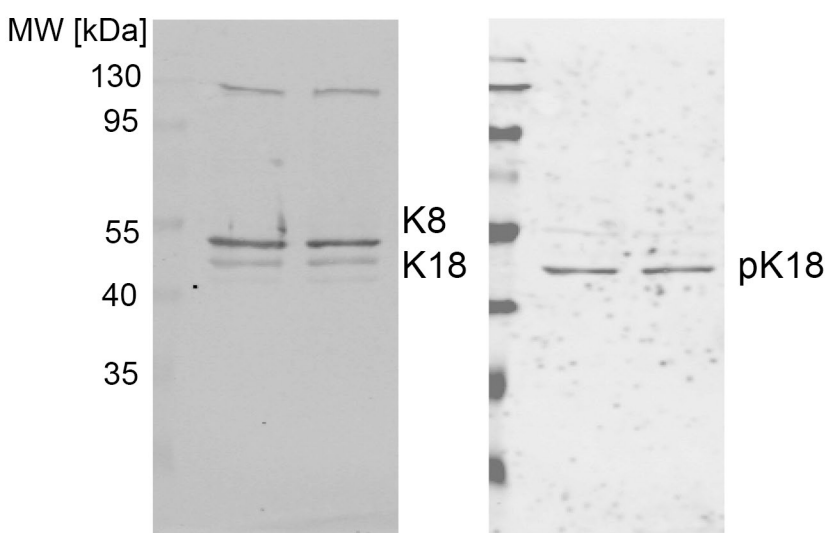

Blots from Suppl. Figure 4 A

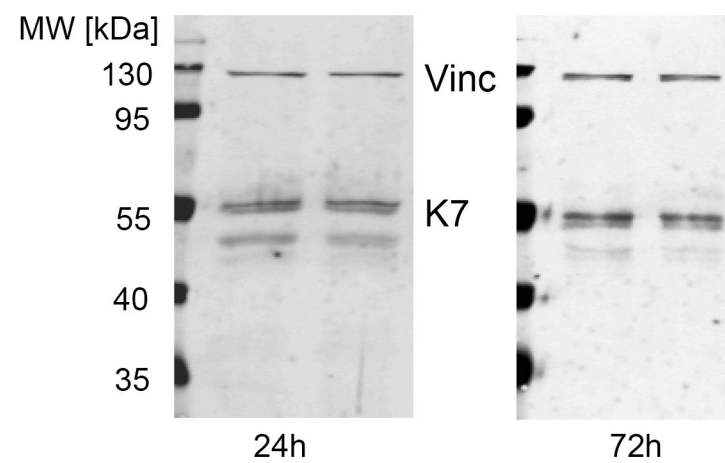

Blots from Suppl. Figure 4 B

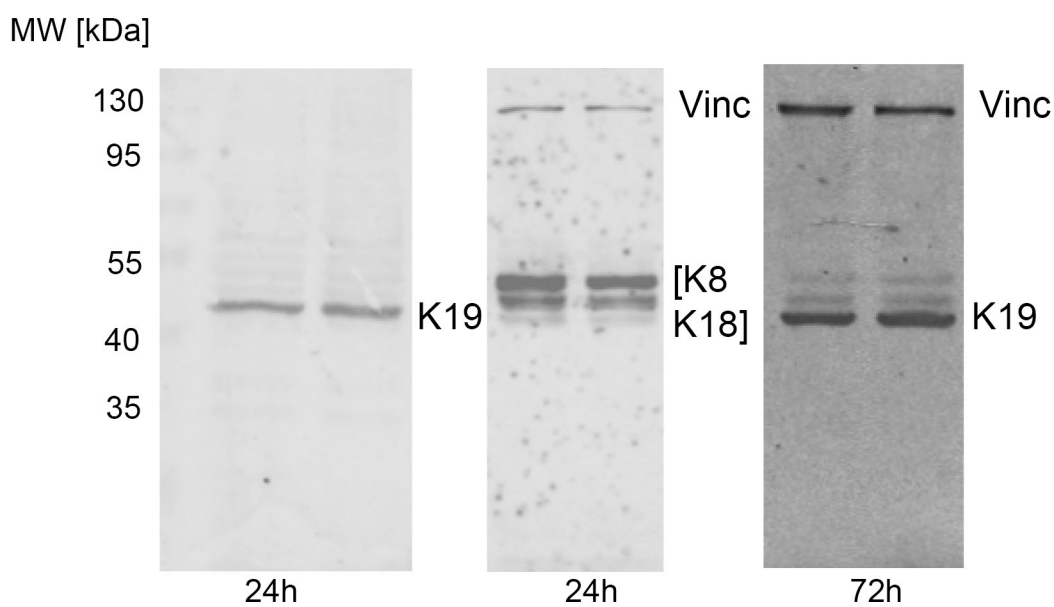

Supplement: 41598_2018_27918_MOESM1_ESM.pdf [file 41598_2018_27918_MOESM1_ESM.pdf]
